# Supplementary material for: Serum metabonomics of acute leukemia using nuclear magnetic resonance spectroscopy
Source: PubMed Central journal article supplement (PMC4969755; doi:10.1038/srep30693), 2016-08-02
Supplement: srep30693-s1.pdf [file srep30693-s1.pdf]

# Serum metabonomics of acute leukemia using nuclear magnetic resonance spectroscopy

\*Syed Ghulam Musharraf,<sup>1,2</sup> Amna Jabbar Siddiqui,<sup>2</sup> Tahir Shamsi,<sup>1,3</sup> M. Iqbal Choudhary,<sup>1,2,4</sup> and Atta-ur-Rahman<sup>1,2</sup>

<sup>1</sup>Dr. Panjwani Center for Molecular Medicine and Drug Research, International Center for Chemical and Biological Sciences, University of Karachi, Karachi-75270, Pakistan;

<sup>2</sup>H.E.J. Research Institute of Chemistry, International Center for Chemical and Biological Sciences, University of Karachi, Karachi-75270, Pakistan;

<sup>3</sup>National Institute of Blood Diseases & Bone Marrow Transplantation, Karachi-75300, Pakistan.

<sup>4</sup>Department of Chemistry, College of Science, King Saud University, Riyadh-1145, Saudi Arabia.

\*Corresponding author. Tel.: +92 021-34824924; 4819010; fax: +92 021-34819018-9.

E-mail address: [musharraf1977@yahoo.com](mailto:musharraf1977@yahoo.com)

# Supplementary Information

**Supplementary table S1:** Clinical classification of patients.

|            | <b>Subtypes</b>                        | <b>Number of patients</b> |
|------------|----------------------------------------|---------------------------|
| <b>AML</b> | AML without maturation                 | 11                        |
|            | AML with maturation                    | 11                        |
|            | Acute promyelocytic leukemia           | 3                         |
|            | Acute myelomonocytic leukemia          | 2                         |
|            | Acute monoblastic leukemia             | 1                         |
|            | Not classified at the time of sampling | 4                         |
| <b>ALL</b> | B-cell                                 | 2                         |
|            | CALLA positive                         | 5                         |
|            | MPO negative                           | 6                         |
|            | Precursor B cell                       | 5                         |
|            | T cell                                 | 9                         |
|            | Not classified at the time of sampling | 5                         |

CALLA: common acute lymphoblastic leukemia-associated antigen

MPO: Myeloperoxidase enzyme

## **Subject characteristics**

| <b>Groups</b>       | <b>Healthy control</b> | <b>ALL</b>  | <b>AML</b> | <b>APA</b>  |
|---------------------|------------------------|-------------|------------|-------------|
| <i>Age in years</i> |                        |             |            |             |
| Min–Max (median)    | 8-73(26)               | 2–61 (22.5) | 5-75 (30)  | 7–55 (22.5) |
| <i>Sex</i>          |                        |             |            |             |
| Male                | 16                     | 23          | 19         | 23          |
| Female              | 16                     | 9           | 13         | 9           |

**Supplementary Table S2:** Cross validated-ANOVA table for assessing the reliability of the generated models

| <b>PLS-DA model</b>  |         |     |          |         |                         |          |
|----------------------|---------|-----|----------|---------|-------------------------|----------|
|                      | SS      | DF  | MS       | F       | p                       | SD       |
| Total corr.          | 363     | 363 | 1        |         |                         | 1        |
| Regression           | 97.8659 | 36  | 2.7185   | 3.35282 | 4.21x10 <sup>-09</sup>  | 1.64879  |
| Residual             | 265.134 | 327 | 0.810808 |         |                         | 0.900449 |
| <b>OPLS-DA model</b> |         |     |          |         |                         |          |
|                      | SS      | DF  | MS       | F       | p                       | SD       |
| Total corr.          | 381     | 381 | 1        |         |                         | 1        |
| Regression           | 155.369 | 60  | 2.58948  | 3.68399 | 2.74 x10 <sup>-14</sup> | 1.60919  |
| Residual             | 225.631 | 321 | 0.702901 |         |                         | 0.838392 |

SS= sum of squares, DF= degree of freedom, MS= mean squares, F= F-test calculate value, p= p-value of the test, SD= standard deviation

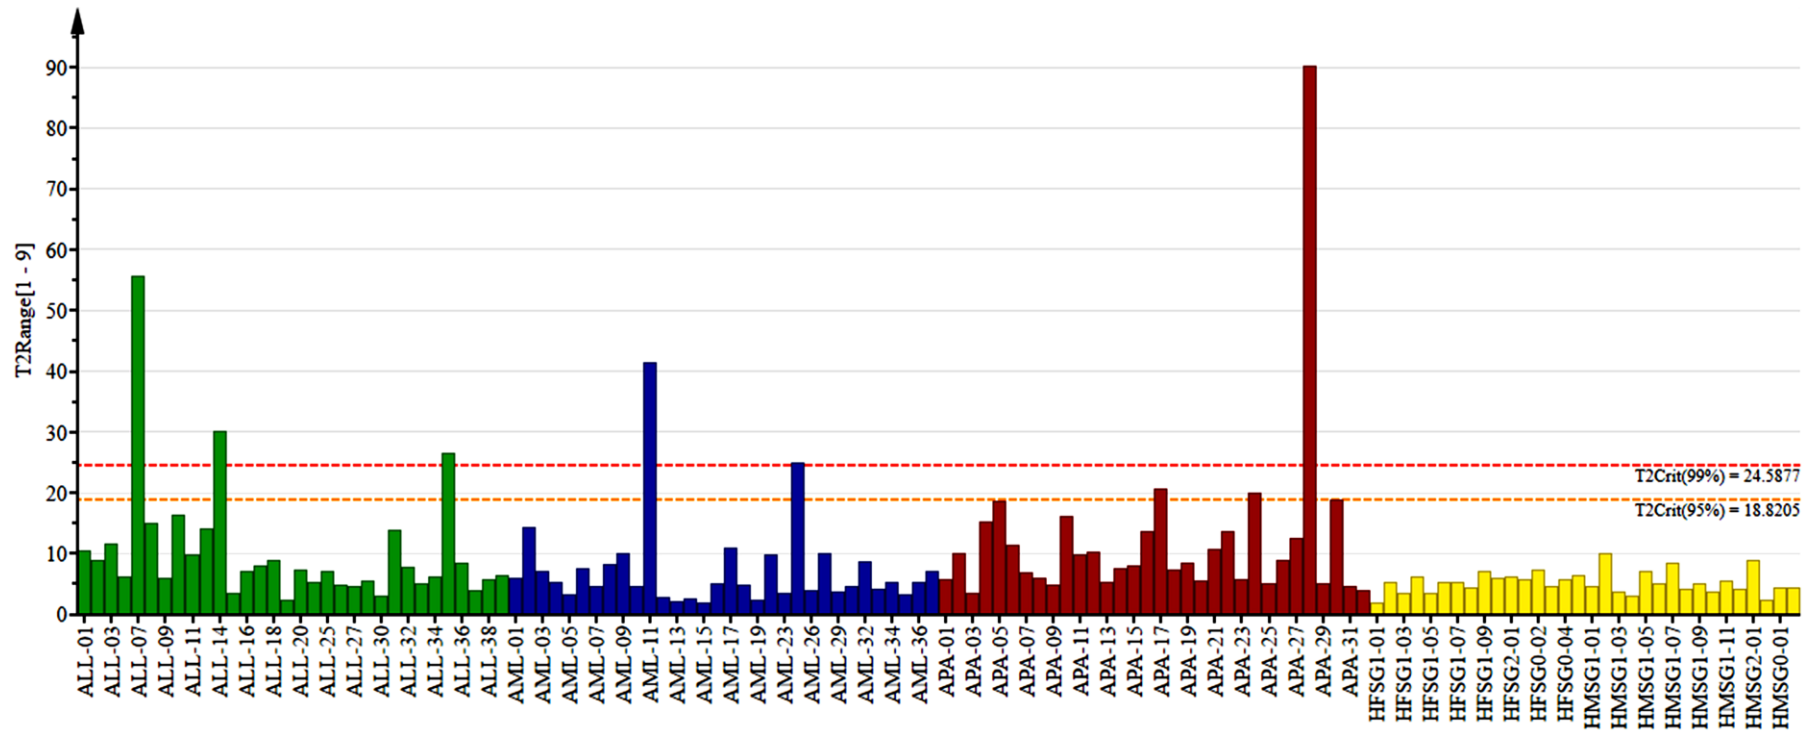

Supplementary Figure S1: Hotelling's  $T^2$  plot with 99% and 95% confidence limits showing outliers.

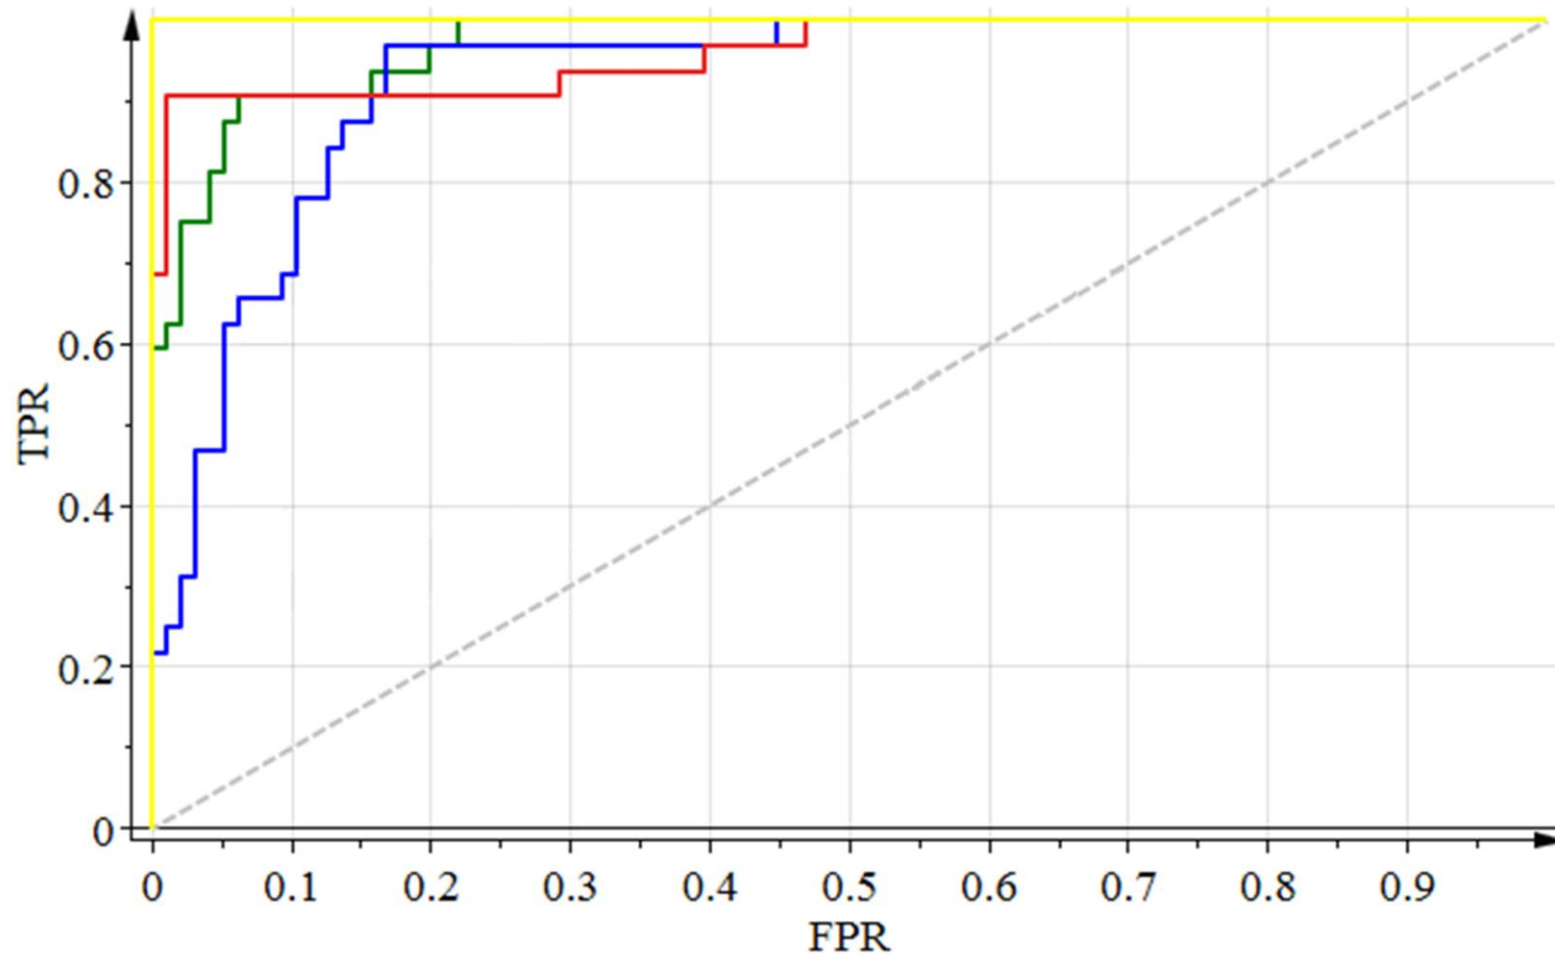

**Supplementary Figure S2:** Receiver operating characteristic (ROC) plot for OPLS-DA model showing sensitivity on y-axis and 1-specificity on x-axis [ALL (green), AML (blue), APA (red) and healthy control (yellow)].
